# Supplementary material
Source: Royal Society of Chemistry journal article supplement (doi:10.1039/d6py00353b)
Supplement: d6py00353b2.pdf [file d6py00353b2.pdf]

Supplementary Information

**Mechanochromic polyurethane elastomers containing main-chain naphthalimide moieties**

Tomoya Tada, Tetsuma Inaoka, Hiromitsu Sogawa and Fumio Sanda\*

Faculty of Chemistry, Materials and Bioengineering, Kansai University

3-3-35 Yamate-cho, Suita, Osaka 564-8680, Japan

\*Corresponding Author.

*E-mail:* [sanda@kansai-u.ac.jp](mailto:sanda@kansai-u.ac.jp) (F. Sanda)

## Instruments

$^1\text{H}$  (400 MHz) and  $^{13}\text{C}$  (100 MHz) NMR spectra were measured in deuterated chloroform ( $\text{CDCl}_3$ ), trifluoroacetic acid-*d* (TFA-*d*) or dimethyl sulfoxide-*d* ( $\text{DMSO-}d_6$ ) on JEOL ECA-400, ECS-400 and ECZ-400 spectrometers. IR spectra were measured on a JASCO FT/IR-4100 spectrophotometer. Number-average molecular weight ( $M_n$ ) and polydispersity ( $\mathcal{D}$ ) values of polymers were determined by size exclusion chromatography (SEC) eluted with LiBr solution (10 mM) in *N,N*-dimethylformamide (DMF) with a Shodex LF-804 column calibrated by polystyrene standards at 40 °C using JASCO SEC system consisting of RI-930, UV-4570, PU-4580, DG-2080-53, CO-965, LC-NetII/ADC. Dynamic light scattering (DLS) measurements were performed using a square glass cell on a Malvern Instruments Zetasizer Nano ZSP at 20 °C. TGA was acquired with a SHIMADZU thermogravimetric analyzer TGA-50 with a heating rate of 10 °C  $\text{min}^{-1}$  from 50 °C to 600 °C under nitrogen at a flow rate of 50 mL  $\text{min}^{-1}$ . UV-vis absorption spectra were recorded on a SHIMADZU UV-2600 spectrophotometer. Photoluminescence spectra and absolute quantum yields were measured on a SHIMADZU spectrofluorophotometer RF-6000. Fluorescence lifetimes of solution samples were measured in a 4-sided quartz cell on a HORIBA DeltaFlex Lifetime System equipped with a NanoLED-405 ( $\lambda_{\text{ex}} = 405 \text{ nm}$ ). Lap shear test was performed on a SHIMADZU EZ-LX.

## Reagents

4-Bromo-1,8-naphthalic anhydride (TCI), 6-amino-1-hexanol (TCI), trimethylsilylacetylene (Apollo Scientific Ltd.), 1,4-butanediol (BD, TCI), 1,4-diiodobenzene (TCI), diisopropylamine (TCI), CuI (NACALAI TESQUE, INC.), polytetrahydrofuran 2000 (PTHF, FUJIFILM Wako Pure Chemical), methylenediphenyl 4,4'-diisocyanate (MDI, FUJIFILM Wako Pure Chemical) and dibutyltin dilaurate (DBTDL, TCI) were purchased and used without purification.  $\text{PdCl}_2(\text{PPh}_3)_2$  was synthesized according to the literature.<sup>S1</sup> Solvents used in the reactions under Ar were dehydrated over molecular sieves 4A/16 and degassed by Ar bubbling before use.

## Synthesis of monomer 1

### Compound 2

A mixture of 4-bromo-1,8-naphthalic anhydride (5.00 g, 18.0 mmol), 6-amino-1-hexanol (2.53 g, 21.6 mmol) and EtOH (100 mL) was stirred at 80 °C for 18 h. After cooling the reaction mixture to r.t., it was slowly poured into water (300 mL) to precipitate a solid. It was collected by filtration, and dried under reduced pressure to obtain **2** (6.0 g, 15.9 mmol, 88%) as yellow solid.  $^1\text{H}$  NMR (400 MHz,  $\text{CDCl}_3$ ):  $\delta$  8.65 (dd,  $J = 1.2, 0.8 \text{ Hz}$ , 1H), 8.56 (dd,  $J = 1.2, 0.8 \text{ Hz}$ , 1H), 8.42 (d,  $J = 8.0 \text{ Hz}$ , 1H), 8.05 (d,  $J = 8.0 \text{ Hz}$ , 1H), 7.84 (t,  $J = 7.6 \text{ Hz}$ , 1H), 4.17 (t,  $J = 8.0 \text{ Hz}$ , 2H), 3.64 (broad s, 2H), 1.79–1.37 (m, 8H).

### Compound 3

A mixture of **2** (2.0 g, 4.5 mmol), trimethylsilylacetylene (0.95 mL, 6.8 mmol), PdCl<sub>2</sub>(PPh<sub>3</sub>)<sub>2</sub> (9.5 mg, 0.013 mmol), CuI (2.6 mg, 0.013 mmol), PPh<sub>3</sub> (3.6 mg, 0.013 mmol), Et<sub>3</sub>N (15 mL) and THF (30 mL) was stirred under Ar at 80 °C for 18 h. After cooling the reaction mixture to r.t., solvents were evaporated off. CHCl<sub>3</sub> was added to the residue, and the resultant solution was washed with saturated aq. NH<sub>4</sub>Cl. The organic layer was separated and dried over MgSO<sub>4</sub>, and concentrated on a rotary evaporator. The residual mass was purified by silica gel column chromatography (eluent: hexane/ethyl acetate = 1/1, v/v) to obtain compound **3** (1.60 g, 4.07 mmol, 90%) as a yellow solid. <sup>1</sup>H NMR (400 MHz, CDCl<sub>3</sub>) δ 8.63–8.61 (m, 2H), 8.52 (d, *J* = 7.6, 1H), 7.90 (d, *J* = 7.6 Hz, 1H), 7.81 (t, *J* = 7.6 Hz, 1H), 4.17 (t, *J* = 7.6 Hz, 2H), 3.64 (t, *J* = 6.4 Hz, 2H), 1.75–1.45 (m, 8H), 0.37 (s, 9H).

#### Compound 4

A mixture of **3** (1.57 g, 3.99 mmol), K<sub>2</sub>CO<sub>3</sub> (1.00 g, 7.23 mmol) and MeOH (50 mL) was stirred at r.t. for 2 h. Then, the reaction mixture was slowly poured into water (300 mL) to precipitate a solid. It was separated by filtration, and dried under reduced pressure. The crude product was purified by silica gel column chromatography (eluent: hexane/ethyl acetate = 2/3 v/v) to obtain **4** (0.30 g, 0.93 mmol, 23%) as a pale-yellow solid. <sup>1</sup>H NMR (400 MHz, CDCl<sub>3</sub>) δ 8.65 (dd, *J* = 13.0 Hz, 7.8 Hz, 2H), 8.53 (d, *J* = 7.7 Hz, 1H), 7.94 (d, *J* = 7.7 Hz, 1H), 7.83 (dd, *J* = 8.4, 7.5 Hz, 1H), 4.20–4.16 (m, 2H), 3.64 (q, *J* = 5.9 Hz, 2H), 1.80–1.72 (m, 2H), 1.63–1.57 (m, 4H), 1.50–1.37 (m, 5H).

#### Monomer 1

A mixture of compound **4** (0.200 g, 0.622 mmol), 1,4-diodobenzene (0.0825 g, 0.250 mmol), PdCl<sub>2</sub>(PPh<sub>3</sub>)<sub>2</sub> (5.26 mg, 7.50 μmol), CuI (0.14 mg, 7.5 μmol), PPh<sub>3</sub> (0.20 mg, 7.5 μmol), *i*Pr<sub>2</sub>NH (1 mL) and THF (10 mL) was stirred under Ar at r.t. for 18 h. After that, a precipitated solid was separated by filtration, and dried under reduced pressure to obtain **1** (0.176 g, 0.246 mmol, 98%) as a yellow solid. <sup>1</sup>H NMR (400 MHz, TFA-*d*) δ 8.95–8.68 (broad, 6H), 8.05–7.96 (broad, 4H), 7.73 (s, 4H), 4.49–4.44 (broad, 4H), 3.99–3.90 (broad, 4H), 2.04–1.56 (broad, 16H).

#### Synthesis of polymers

##### Poly-1

DBTDL (1 mol%) was added to a stirred mixture of compound **1**, PTHF (*M*<sub>n</sub> = 2,000), and MDI in THF and the mixture was stirred at 70 °C for 3 h. A solution of BD in THF (10 mL) was then added and the reaction mixture was stirred at 70 °C for an additional 24 h. MeOH (1 mL) was added to the reaction mixture and after stirring for another 30 min the reaction mixture was poured into H<sub>2</sub>O (300 mL). The precipitate was filtered off and dried *in vacuo* at r.t. for 24 h to obtain poly-**1** as a yellow rubbery solid.

### **Poly-2 and poly-2-1**

Poly-2 was synthesized in a manner similar to poly-1, without adding 1. Poly-2-1 was prepared by mixing poly-2 (0.375 g) and 1 (0.83 mg) in THF, followed by volatilization of THF.

### **Preparation of polyurethane films**

**Typical Procedure.** A solution of poly-1 (375 mg) in THF (7.5 mL) was poured into a petri dish (radius: 30 mm). It was covered with an inverted funnel to evaporate THF slowly for a period of 24 h. The resulting film was further dried *in vacuo* at r.t. overnight.

### **Computation**

QM calculations were performed with the Gaussian 16,<sup>S2</sup> Rev C.01, using the DFT method with  $\omega$ B97XD functional in conjunction with 6-31G\* basis set, running on the supercomputer system Fugaku provided by the RIKEN Center for Computational Science and Research Center for Computational Science, Okazaki, Japan. The UV-vis absorption and fluorescence spectra were simulated by the TD-DFT method, and analyzed using GaussView 6.<sup>S3</sup> The simulated CD/UV-vis absorption spectra, and geometry-optimized structures were illustrated using GaussView 6 and PyMOL,<sup>S4</sup> respectively. Noncovalent interactions<sup>S5</sup> were indicated by the reduced density gradient isosurfaces generated by Multiwfn<sup>S6,S7</sup> based on the PROAIMS wavefunction calculated by Gaussian and visualized by PyMOL. MD simulations were performed with LAMMPS 2020.<sup>S8</sup> The initial structures for MD simulations were constructed using the Winmostar V11, X-Ability Co. Ltd., Tokyo, Japan. Solvent boxes were constructed using PACKMOL.<sup>S9</sup> The general amber force field (GAFF) was used.<sup>S10,S11</sup> Atomic charges were assigned using a restrained electrostatic potential (RESP) fit mode<sup>S12,S13</sup> with calculations performed at the HF/6-31G\* level using Gaussian 16. The long-range Coulomb interactions were calculated using the smooth particle mesh Ewald (SPME) method.<sup>S14</sup> A long-range correction of the LJ potential was applied to the energy and pressure. The MD trajectories were analyzed using CPPTRAJ,<sup>S15</sup> and the snapshots were taken using OVITO.<sup>S16</sup>

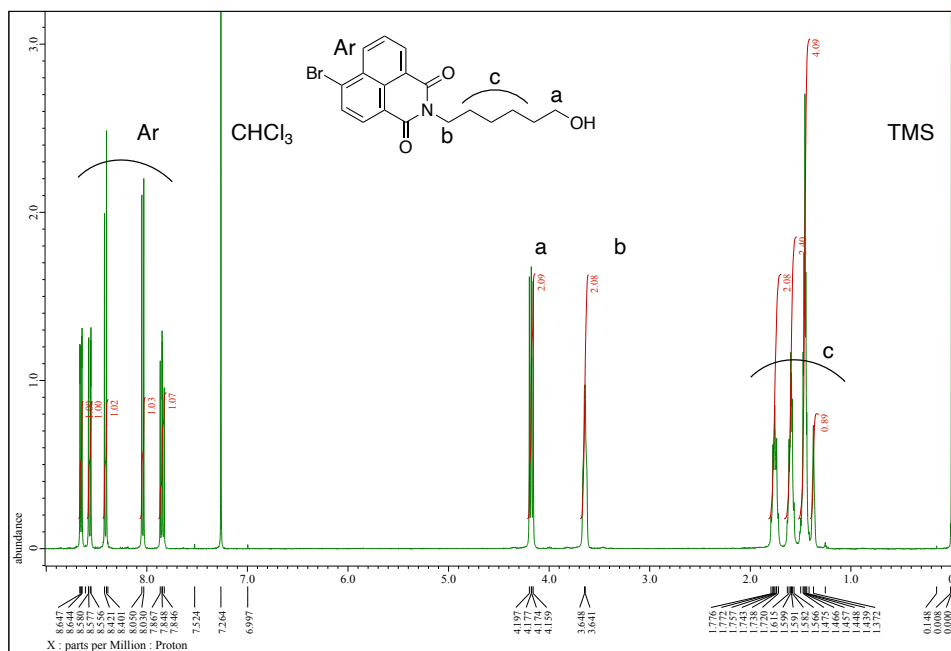

**Fig. S1** <sup>1</sup>H NMR (400 MHz) spectrum of **2** measured in CDCl<sub>3</sub>.

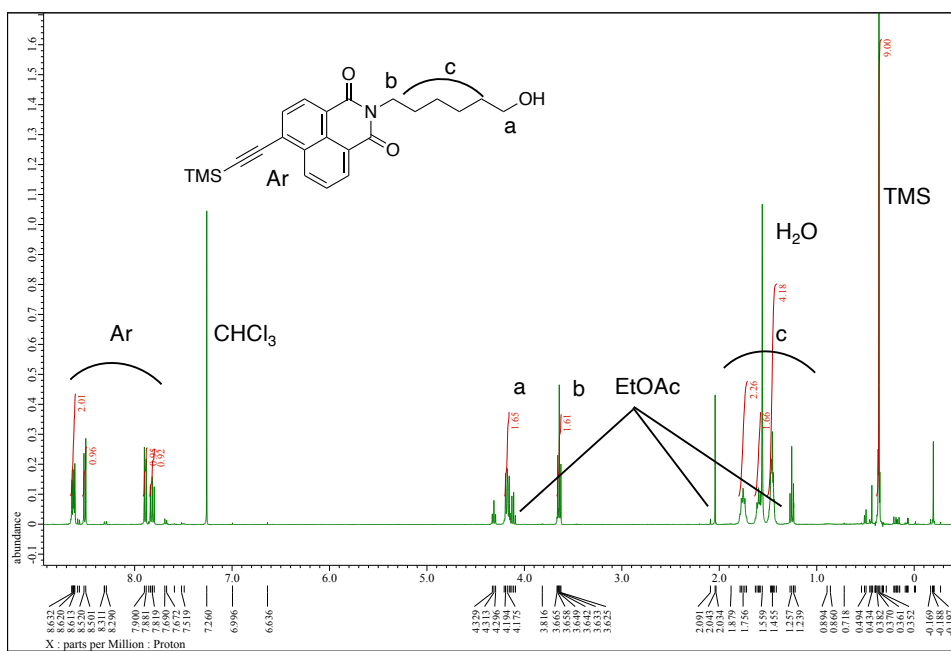

**Fig. S2** <sup>1</sup>H NMR (400 MHz) spectrum of **3** measured in CDCl<sub>3</sub>.

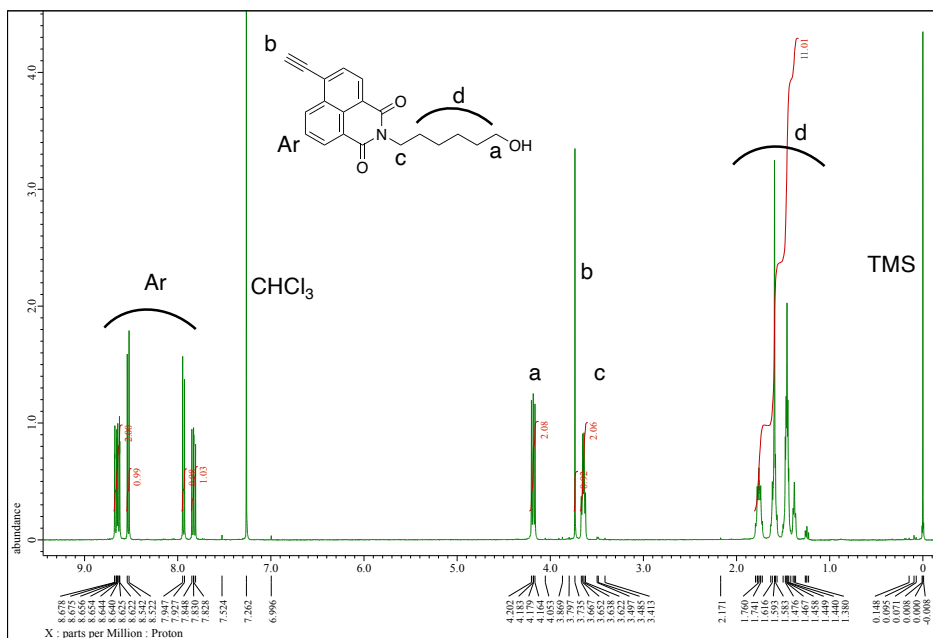

**Fig. S3** <sup>1</sup>H NMR (400 MHz) spectrum of **4** measured in CDCl<sub>3</sub>.

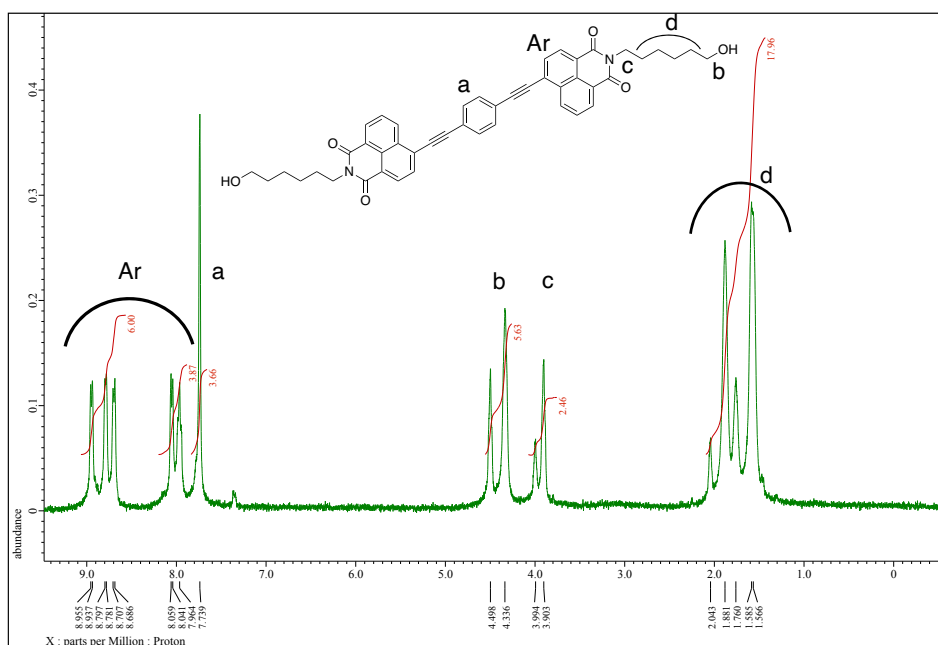

**Fig. S4** <sup>1</sup>H NMR (400 MHz) spectrum of **1** measured in TFA-*d*.

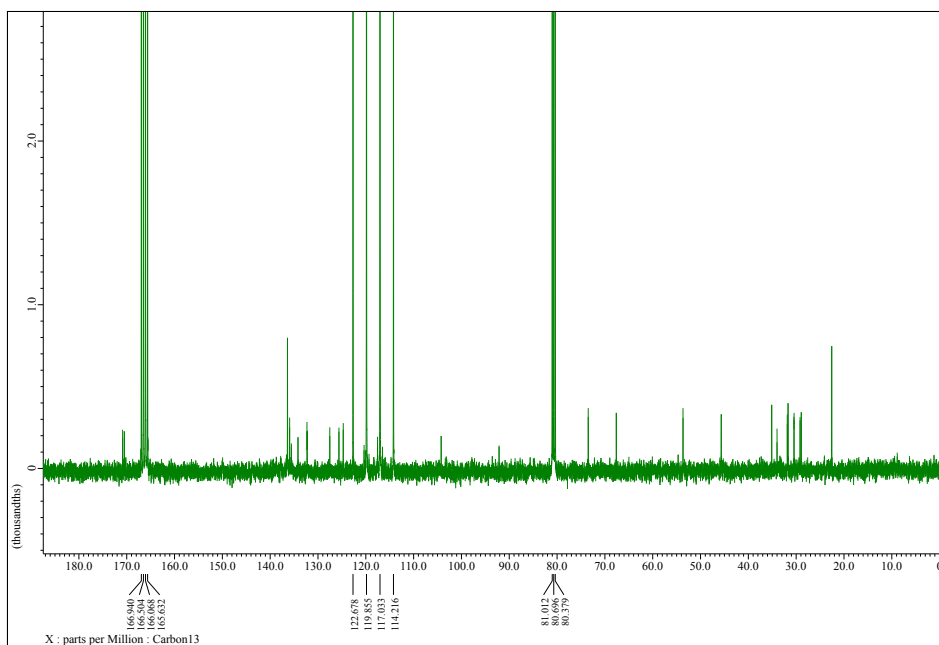

**Fig. S5**  $^{13}\text{C}$  NMR (400 MHz) spectrum of **1** measured in TFA-*d*.

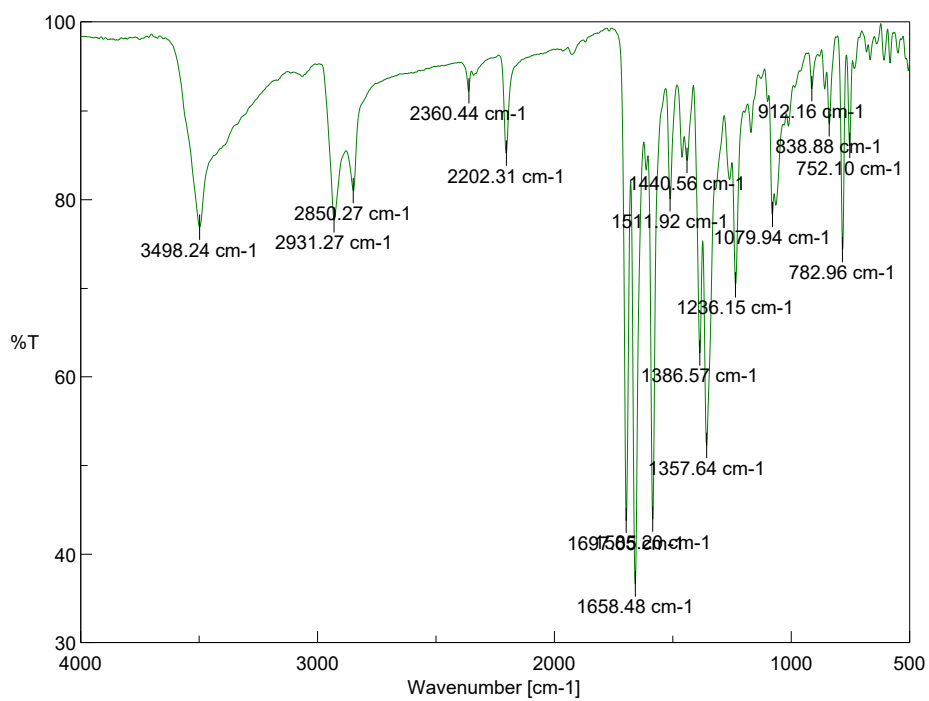

**Fig. S6** IR spectrum of **1** measured by the KBr pellet method.

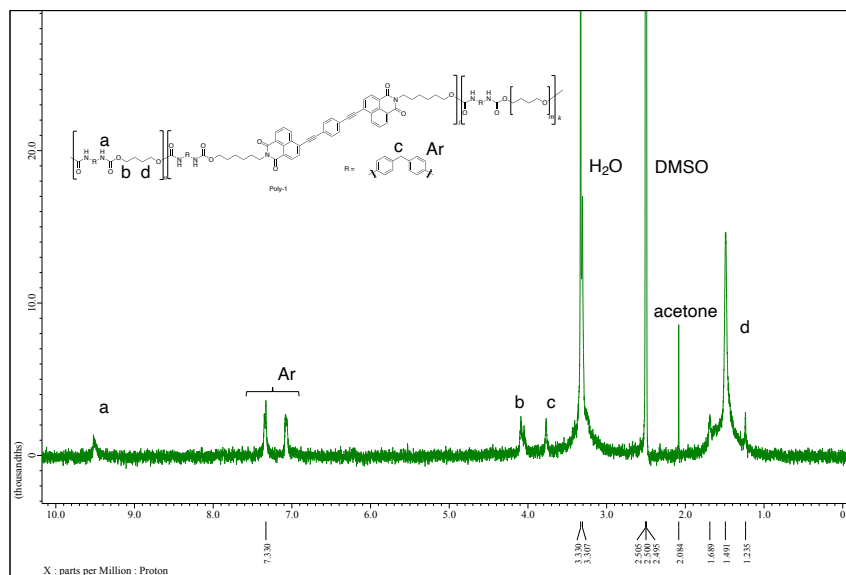

**Fig. S7**  $^1\text{H}$  NMR (400 MHz) spectrum of poly-**1**<sub>0.3</sub> measured in  $\text{DMSO-}d_6$ .

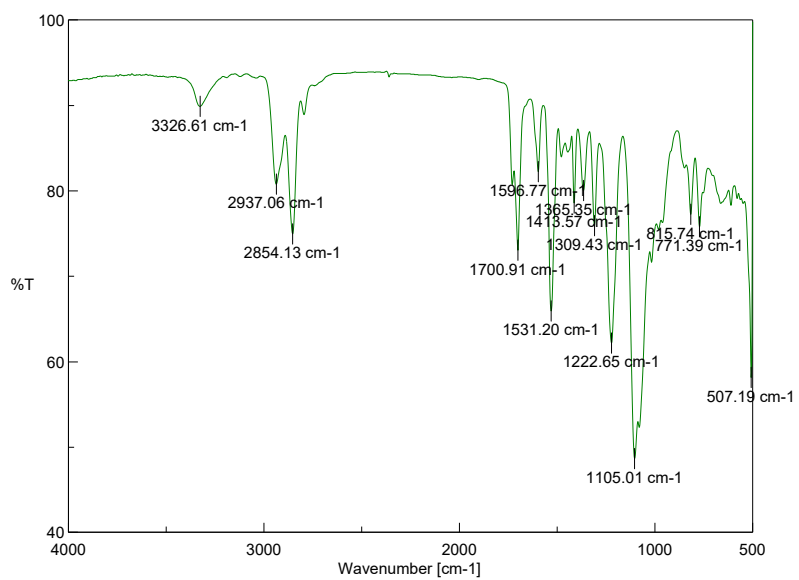

**Fig. S8** IR spectrum of poly-**1**<sub>0.3</sub> measured by the KBr pellet method.

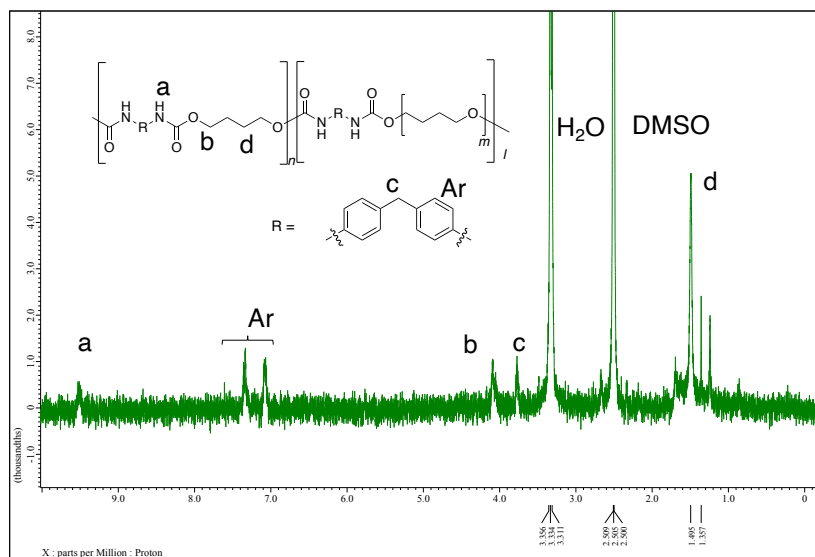

**Fig. S9**  $^1\text{H}$  NMR (400 MHz) spectrum of poly-2-1<sub>0.3</sub> measured in DMSO-*d*<sub>6</sub>.

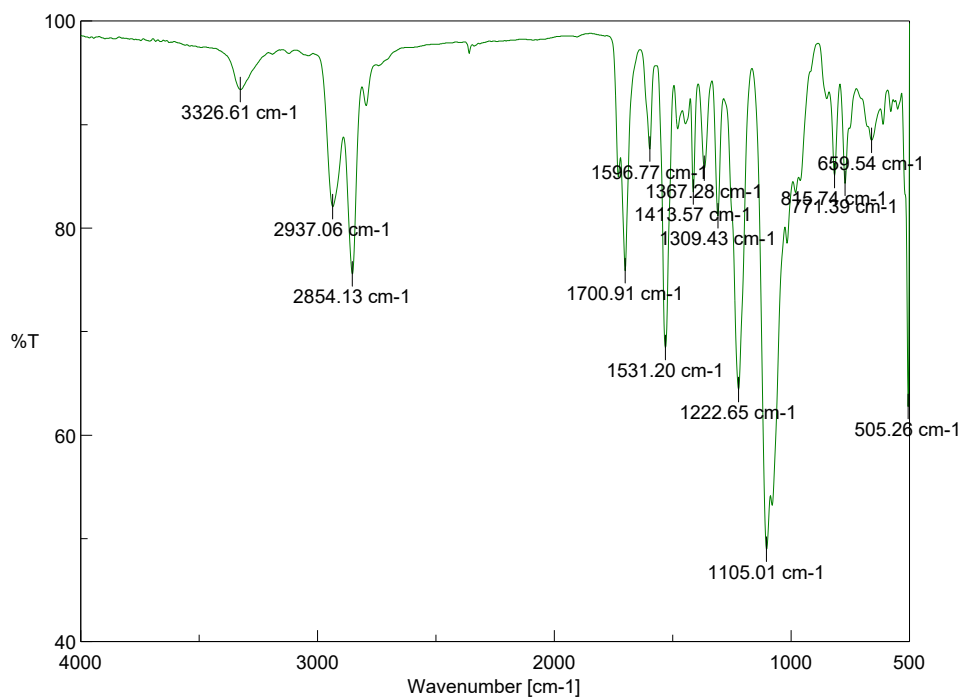

**Fig. S10** IR spectrum of poly-2-1<sub>0.3</sub> measured by the KBr pellet method.

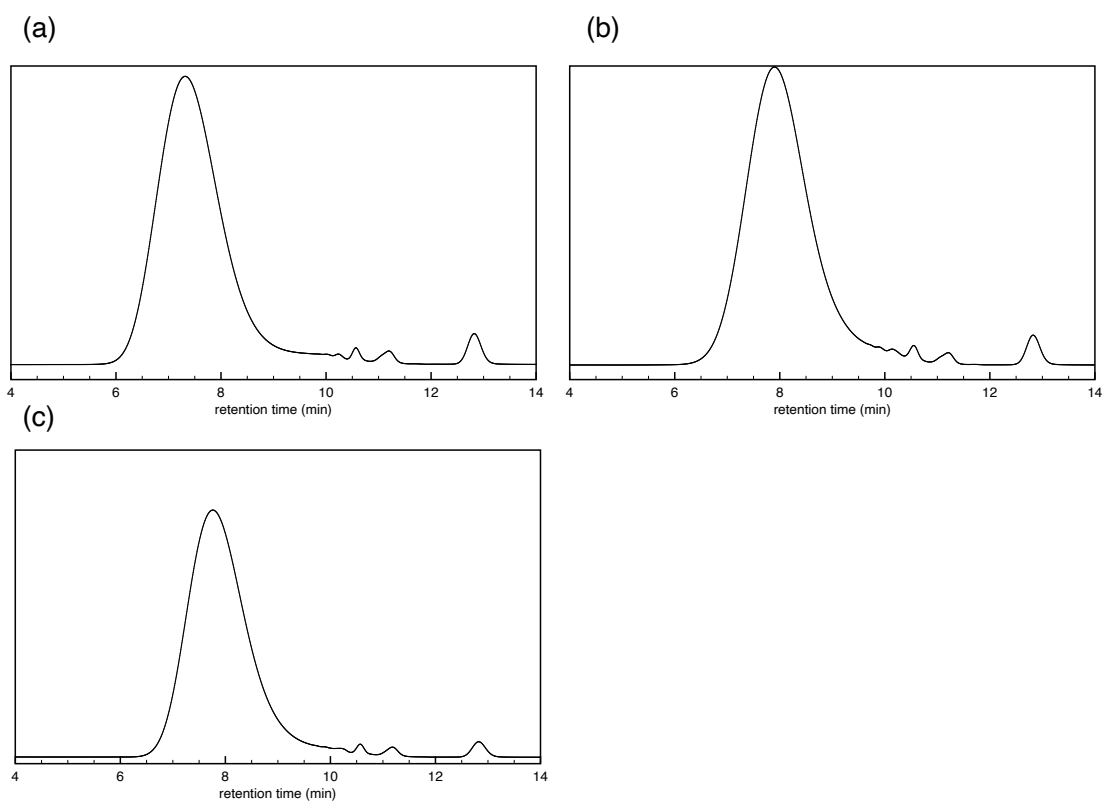

**Fig. S11** SEC charts of (a) poly- $1_{0.1}$ , (b) poly- $1_{0.3}$  and (c) poly- $2-1_{0.3}$  (eluent: THF).

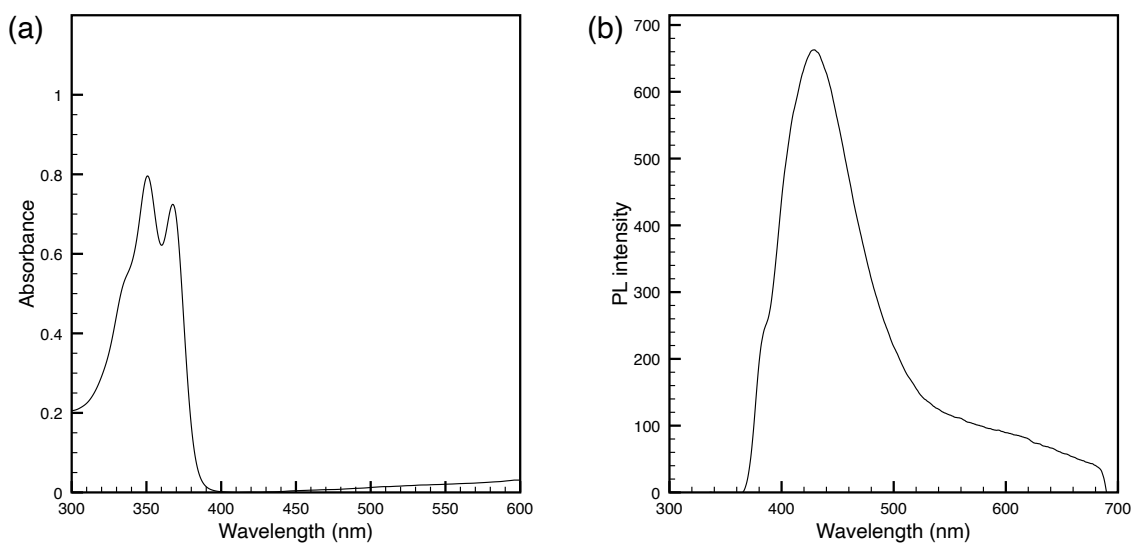

**Fig. S12** (a) UV-vis absorption spectrum of **4** measured in NMP ( $c = 0.05$  mM) and (b) PL spectrum of **4** excited at 351 nm measured in NMP ( $c = 0.05$  mM).

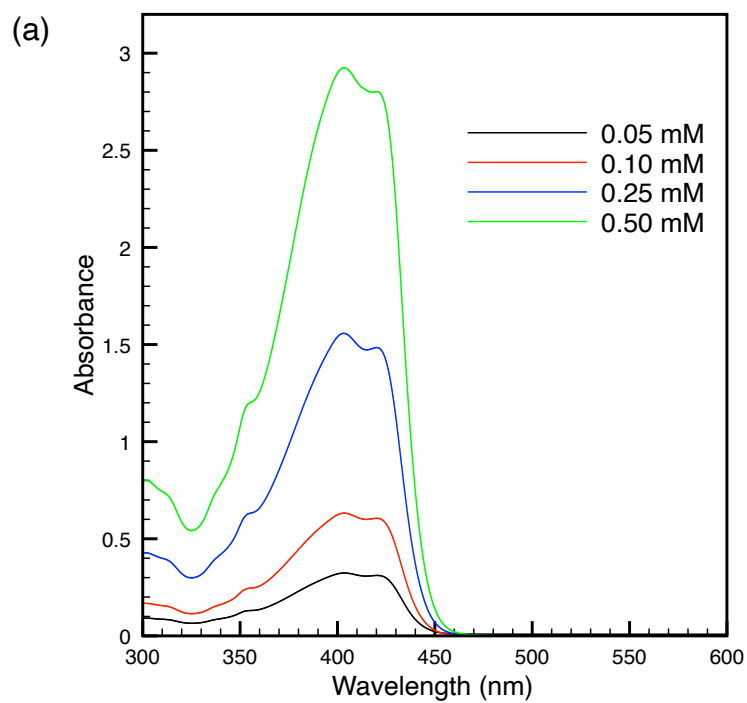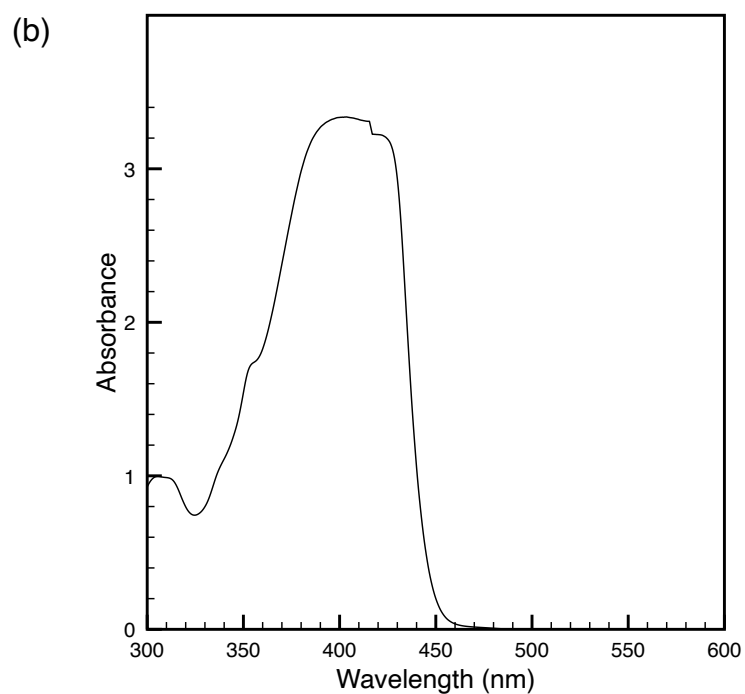

**Fig. S13** (a) Non-normalized UV-vis absorption spectra of **1** measured in NMP ( $c = 0.05$ – $0.50$  mM), corresponding to Fig. 1a. (b) UV-vis absorption spectrum of **1** measured in NMP ( $c = 0.80$  mM), showing saturation of the absorbance.

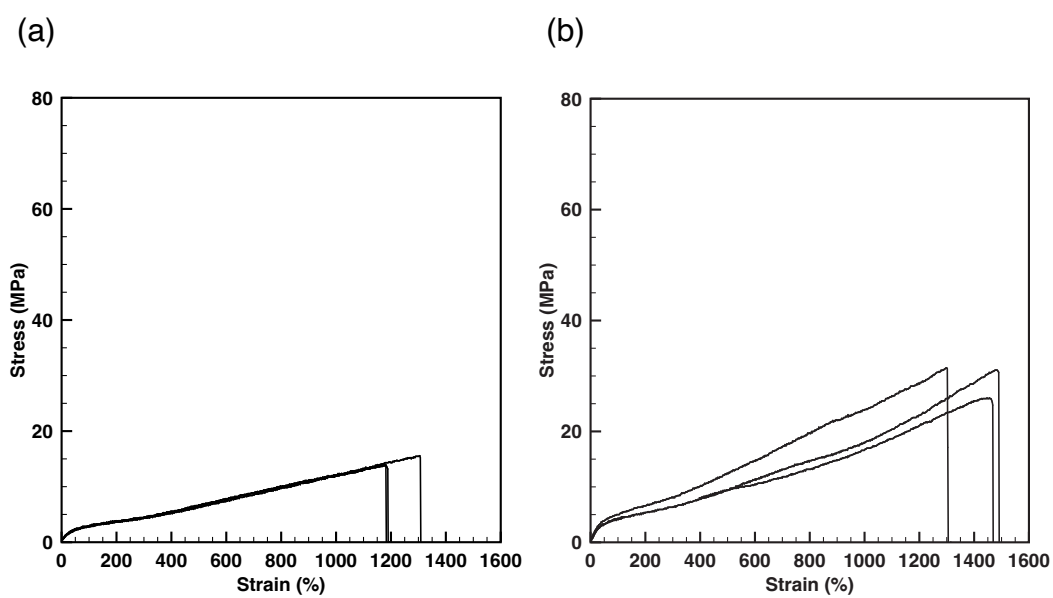

**Fig. S14** Stress-strain curves of (a) poly-1<sub>0.3</sub> and (c) poly-2-1<sub>0.3</sub> films. Each curve shows data obtained from three different specimens. The experiments were conducted with a strain rate of 10 mm/min at r.t.

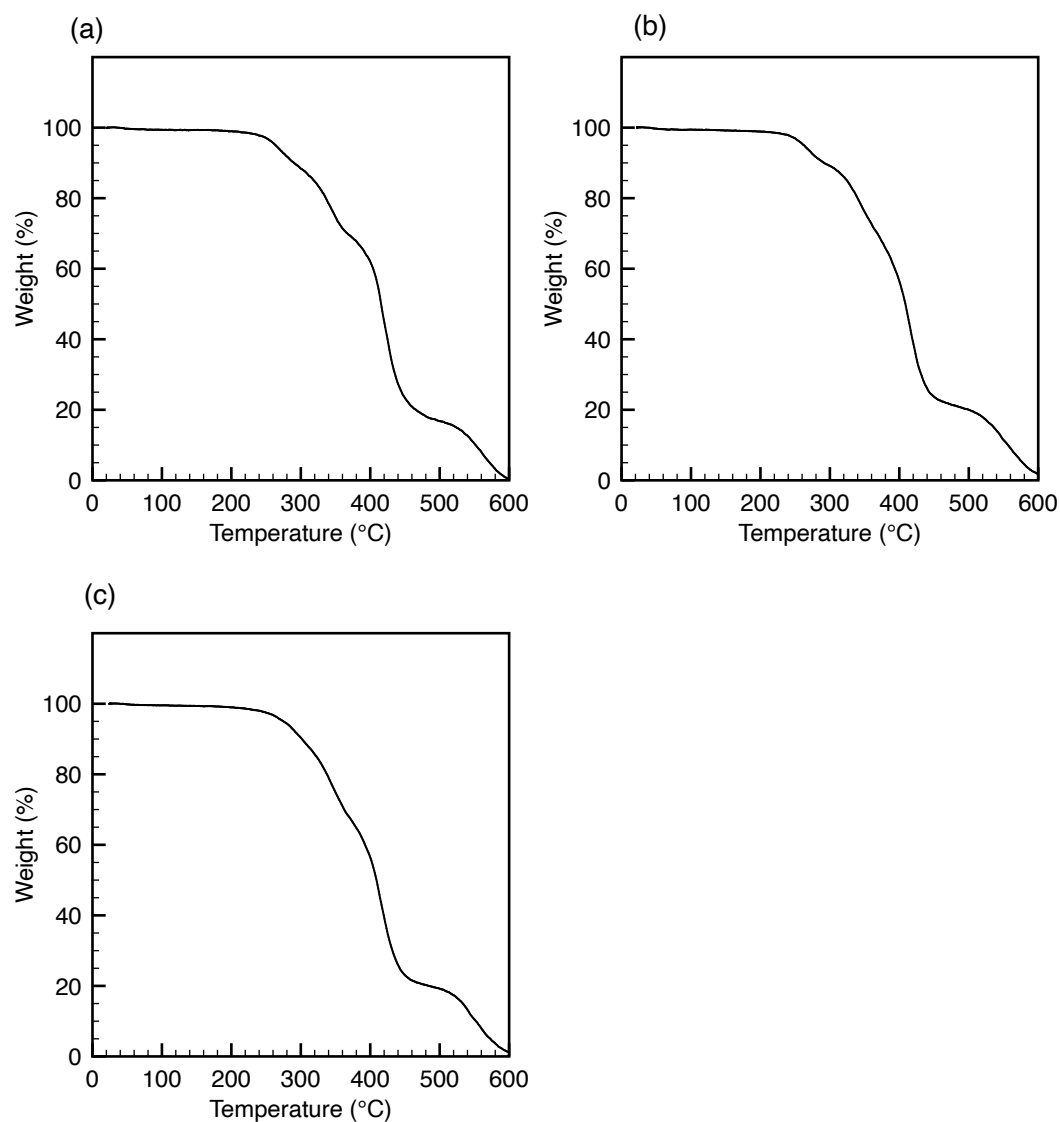

**Fig. S15** TGA traces of (a) poly-**1**<sub>0.1</sub>, (b) poly-**1**<sub>0.1</sub> and (c) poly-**2-1**<sub>0.3</sub> measured at a heating rate of 10 °C/min under N<sub>2</sub>.

**Table S1** 5% and 10% weight loss temperatures of the polymers<sup>a</sup>

| polyurethane                    | $T_{d5}$ (°C) | $T_{d10}$ (°C) |
|---------------------------------|---------------|----------------|
| poly- <b>1</b> <sub>0.1</sub>   | 263           | 290            |
| poly- <b>1</b> <sub>0.3</sub>   | 260           | 290            |
| poly- <b>2-1</b> <sub>0.3</sub> | 275           | 301            |

<sup>a</sup> Determined by TGA under N<sub>2</sub> at a heating rate of 10 °C/min.

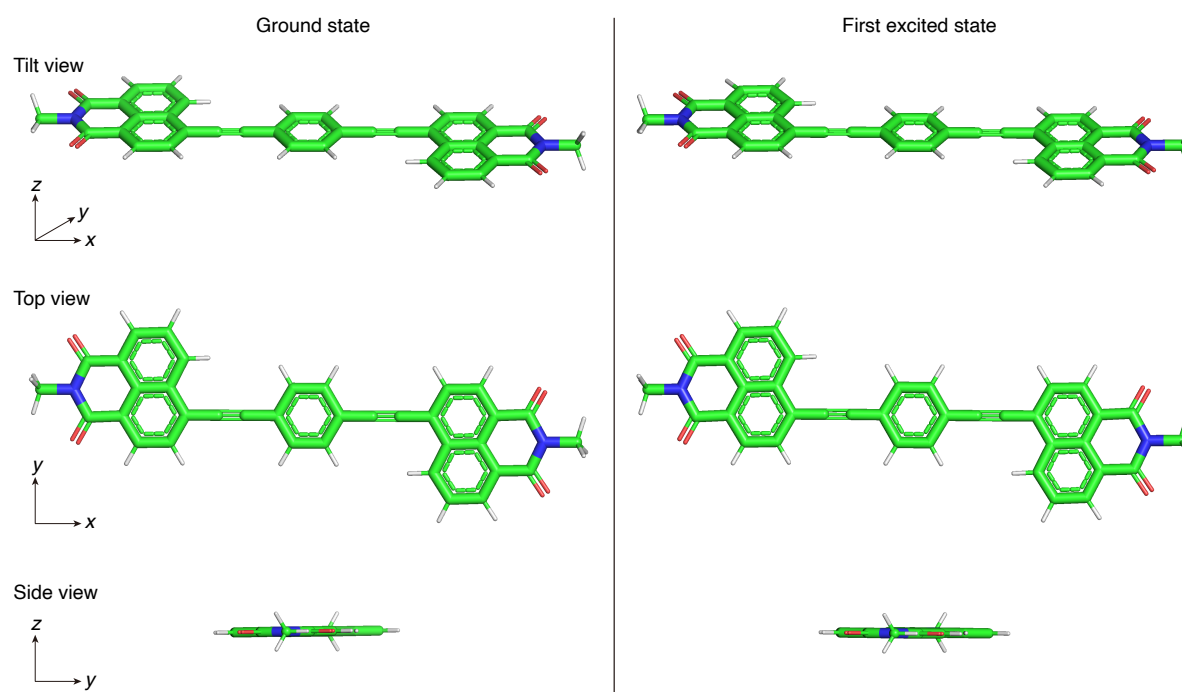

**Fig. S16** Conformers of monomer models of **1** at the ground state (left) and first excited state (right). At the ground state, the geometries were optimized by the DFT method ( $\omega$ B97XD/6-31G\*). At the first excited state, the geometries were optimized by the TD-DFT method ( $\omega$ B97XD/6-31G\*) starting from the geometries optimized at the ground state.

## References

- S1 A. Naghipour, A. Ghorbani-Choghmarani, H. Babae, M. Hashemi and B. Notash, Crystal structure of a novel polymorph of trans-dichlorobis(triphenylphosphine)palladium(II) and its application as a novel, efficient and retrievable catalyst for the amination of aryl halides and Stille cross-coupling reactions, *J. Organomet. Chem.*, 2017, **841**, 31–38. <https://doi.org/10.1016/j.jorganchem.2016.10.002>
- S2 M. J. Frisch, G. W. Trucks, H. B. Schlegel, G. E. Scuseria, M. A. Robb, J. R. Cheeseman, G. Scalmani, V. Barone, G. A. Petersson, H. Nakatsuji, X. Li, M. Caricato, A. V. Marenich, J. Bloino, B. G. Janesko, R. Gomperts, B. Mennucci, H. P. Hratchian, J. V. Ortiz, A. F. Izmaylov, J. L. Sonnenberg, D. Williams-Young, F. Ding, F. Lipparini, F. Egidi, J. Goings, B. Peng, A. Petrone, T. Henderson, D. Ranasinghe, V. G. Zakrzewski, J. Gao, N. Rega, G. Zheng, W. Liang, M. Hada, M. Ehara, K. Toyota, R. Fukuda, J. Hasegawa, M. Ishida, T. Nakajima, Y. Honda, O. Kitao, H. Nakai, T. Vreven, K. Throssell, J. A. Montgomery, Jr., J. E. Peralta, F. Ogliaro, M. J. Bearpark, J. J. Heyd, E. N. Brothers, K. N. Kudin, V. N. Staroverov, T. A. Keith, R. Kobayashi, J. Normand, K. Raghavachari, A. P. Rendell, J. C. Burant, S. S. Iyengar, J. Tomasi, M. Cossi, J. M. Millam, M. Klene, C. Adamo, R. Cammi, J. W. Ochterski, R. L. Martin, K. Morokuma, O. Farkas, J. B. Foresman and D. J. Fox, Gaussian, Inc., Wallingford CT, 2016.
- S3 GaussView, Version 6, R. Dennington, T. A. Keith and J. M. Millam, Semichem Inc., Shawnee Mission, KS, 2016.
- S4 L. Schrödinger and W. L. DeLano, PyMOL 2020, Available from: <https://www.pymol.org/pymol>
- S5 E. R. Johnson, S. Keinan, P. Mori-Sánchez, J. Contreras-García, A. J. Cohen and W. Yang, Revealing Noncovalent Interactions, *J. Am. Chem. Soc.*, 2010, **132**, 6498–6506. <https://doi.org/10.1021/ja100936w>
- S6 T. Lu and F. Chen, Multiwfn: A Multifunctional Wavefunction Analyzer, *J. Comput. Chem.* **2012**, *33*, 580–592. <https://doi.org/10.1002/jcc.22885>
- S7 T. Lu, A comprehensive electron wavefunction analysis toolbox for chemists, Multiwfn. *J. Chem. Phys.*, 2024, **161**, 082503. <https://doi.org/10.1063/5.0216272>
- S8 A. P. Thompson, H. M. Aktulga, R. Berger, D. S. Bolintineanu, W. M. Brown, P. S. Crozier, P. J. in't Veld, A. Kohlmeyer, S. G. Moore, T. D. Nguyen, R. Shan, M. J. Stevens, J. Tranchida, C. Trott and S. J. Plimpton, LAMMPS - A Flexible Simulation Tool for Particle-Based Materials Modeling at the Atomic, Meso, and Continuum Scales, *Comput. Phys. Commun.*, 2022, **271**, 108171. <https://doi.org/10.1016/j.cpc.2021.108171>
- S9 L. Martínez, R. Andrade, E. G. Birgin, J. M. Martínez, PACKMOL: A Package for Building Initial Configurations for Molecular Dynamics Simulations, *J. Comput. Chem.*, 2009, **30**, 2157–2164. <https://doi.org/10.1002/jcc.21224>

- S10 J. Wang, R. M. Wolf, J. W. Caldwell, P. A. Kollman, D. A. Case, Development and testing of a general AMBER force field, *J. Comp. Chem.* **2004**, *25*, 1157–1174. <https://doi.org/10.1002/jcc.20035>
- S11 J. Wang, W. Wang, P. A. Kollman and D. A. Case, Automatic atom type and bond type perception in molecular mechanical calculations. *J. Mol. Graph. Model.* **2006**, *25*, 247260. <https://doi.org/10.1016/j.jmgm.2005.12.005>
- S12 C. I. Bayly, P. Cieplak, W. Cornell and P. A. Kollman, A Well-Behaved Electrostatic Potential Based Method Using Charge Restraints for Deriving Atomic Charges: The RESP Model, *J. Phys. Chem.*, 1993, **97**, 10269–10280. <https://doi.org/10.1021/j100142a004>
- S13 W. D. Cornell, P. Cieplak, C. I. Bayly, I. R. Gould, K. M. Merz, D. M. Ferguson, D. C. Spellmeyer, T. Fox, J. W. Caldwell and P. A. Kollman, A Second Generation Force Field for the Simulation of Proteins, Nucleic Acids, and Organic Molecules, *J. Am. Chem. Soc.*, 1995, **117**, 5179–5197. <https://doi.org/10.1021/ja955032e>
- S14 U. Essmann, L. Perera, M. L. Berkowitz, T. Darden, H. Lee and L. G. Pedersen, A Smooth Particle Mesh Ewald Method, *J. Chem. Phys.*, 1995, **103**, 8577–8593. <https://doi.org/10.1063/1.470117>
- S15 D. R. Roe and T. E. Cheatham III, PTRAJ and CPPTRAJ: Software for Processing and Analysis of Molecular Dynamics Trajectory, *J. Chem. Theory Comput.*, 2013, **9**, 3084–3095. <https://doi.org/10.1021/ct400341p>
- S16 A. Stukowski, Visualization and analysis of atomistic simulation data with OVITO—the Open Visualization Tool, *Modelling Simul. Mater. Sci. Eng.*, 2010, **18**, 015012. <https://doi.org/10.1088/0965-0393/18/1/015012>
